# Supplementary material for: Enhanced thermoelectric behaviour and visible light activity of Ag@TiO2/polyaniline nanocomposite synthesized by biogenic-chemical route
Source: Royal Society of Chemistry journal article supplement (doi:10.1039/c4ra02602k), 2014-01-01
Supplement: c4ra02602k1.pdf [file c4ra02602k1.pdf]

## Electronic Supplementary Information

### Enhanced thermoelectric behavior and visible light activity of Ag@TiO<sub>2</sub>/Polyaniline nanocomposite synthesized by biogenic-chemical route

Mohd Omaish Ansari, Mohammad Mansoob Khan, Sajid Ali Ansari, Jintae Lee and Moo Hwan Cho\*

*School of Chemical Engineering, Yeungnam University, Gyeongsan-si, Gyeongbuk 712-749, South Korea. Phone: +82-53-810-2517; Fax: +82-53- 810-4631,\*Email: [mhcho@ynu.ac.kr](mailto:mhcho@ynu.ac.kr)*

#### UV-vis diffuse absorbance spectra of pure TiO<sub>2</sub> and Ag@TiO<sub>2</sub>/Pani nanocomposite

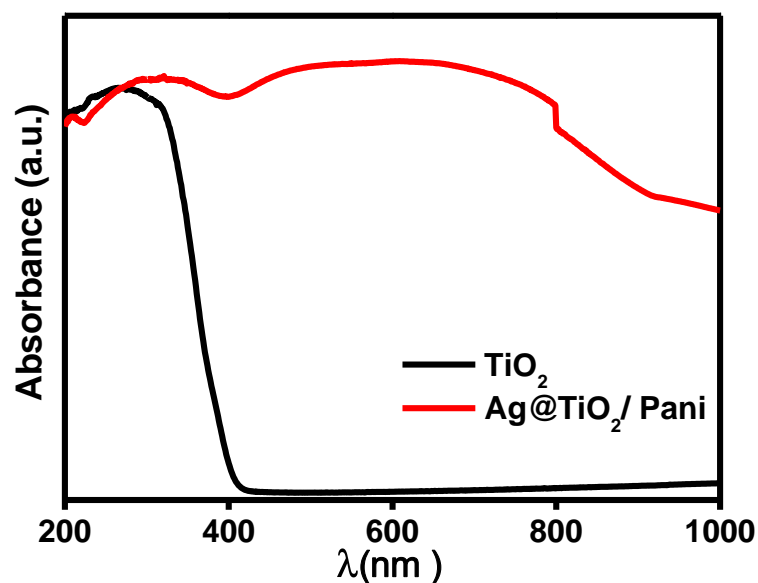

**Fig. S1.** UV-vis diffuse absorbance spectra of pure TiO<sub>2</sub> and Ag@TiO<sub>2</sub>/Pani nanocomposite.

XPS survey spectra of Ag@TiO<sub>2</sub> and Ag@TiO<sub>2</sub>/Pani nanocomposite

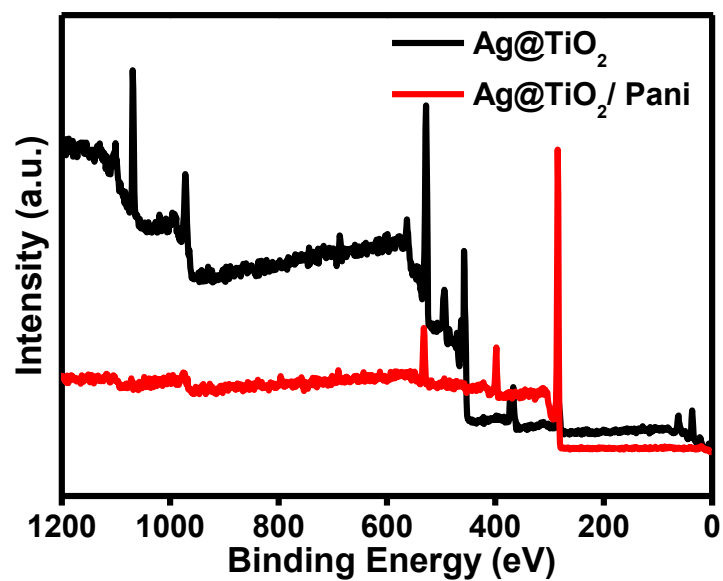

Fig. S2. XPS survey spectra of Ag@TiO<sub>2</sub> and Ag@TiO<sub>2</sub>/Pani nanocomposite.

XPS C 1s spectra of Ag@TiO<sub>2</sub> and Ag@TiO<sub>2</sub>/Pani nanocomposite

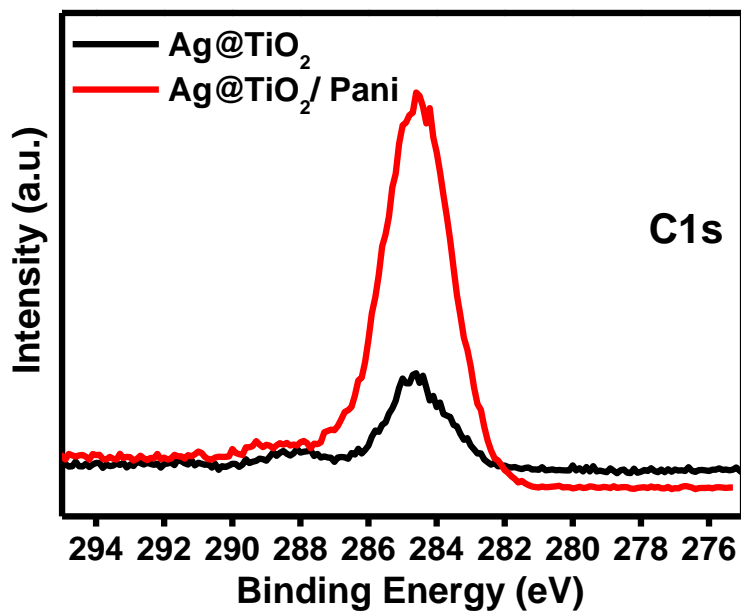

Fig. S3. XPS C 1s spectra of Ag@TiO<sub>2</sub> and Ag@TiO<sub>2</sub>/Pani nanocomposite.

### TEM and HRTEM images of Ag@TiO<sub>2</sub>/Pani nanocomposite

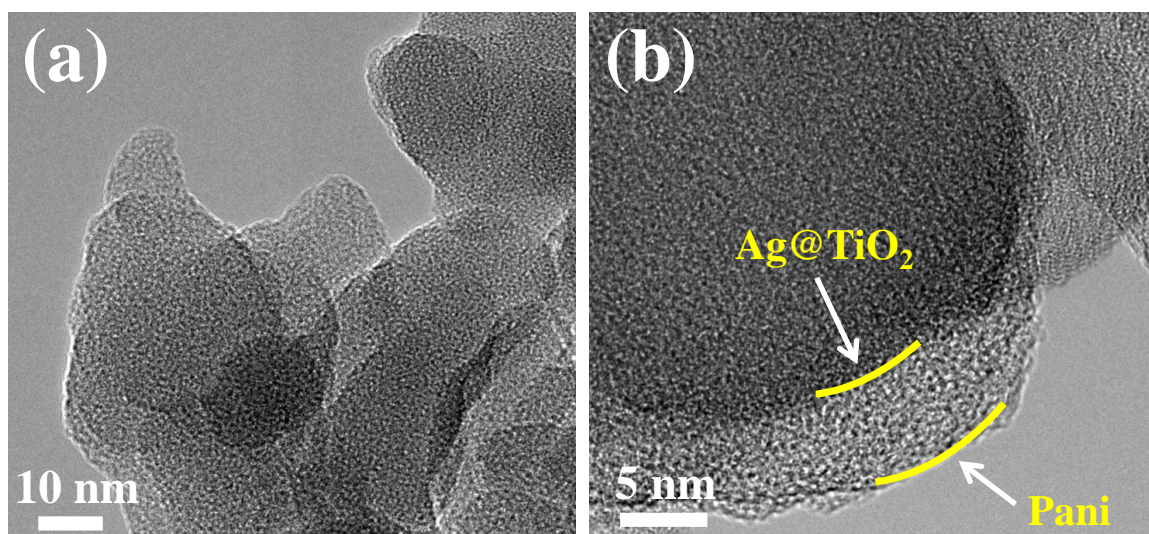

**Fig. S4.** (a) TEM, and (b) HRTEM image of Ag@TiO<sub>2</sub>/Pani nanocomposite.

### SAED pattern of the Ag@TiO<sub>2</sub>/Pani nanocomposite

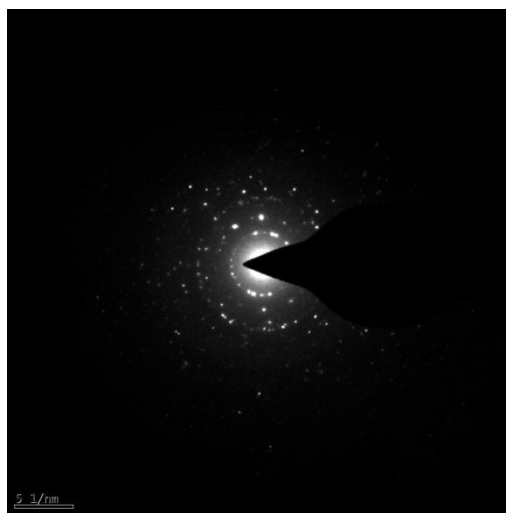

**Fig. S5.** SAED pattern of Ag@TiO<sub>2</sub>/Pani nanocomposite.

**Table S1: DC Electrical Conductivity of HCl and *p*TSA doped Ag@TiO<sub>2</sub>/Pani nanocomposite under cyclic aging conditions.**

| Temperature (°C) | Sample                                   | DC Electrical Conductivity- $\sigma$ (S/cm)        |         |         |         |         |
|------------------|------------------------------------------|----------------------------------------------------|---------|---------|---------|---------|
|                  |                                          | Cycle 1                                            | Cycle 2 | Cycle 3 | Cycle 4 | Cycle 5 |
| 40               | Ag@TiO <sub>2</sub> /Pani<br>(HCl doped) | 6.14                                               | 5.15    | 4.02    | 3.51    | 3.16    |
| 50               |                                          | 6.46                                               | 5.52    | 4.23    | 3.70    | 3.28    |
| 60               |                                          | 6.86                                               | 5.81    | 4.40    | 3.86    | 3.45    |
| 70               |                                          | 7.16                                               | 6.01    | 4.54    | 4.08    | 3.59    |
| 80               |                                          | 7.40                                               | 6.32    | 4.73    | 4.28    | 3.75    |
| 90               |                                          | 7.62                                               | 6.51    | 4.92    | 4.52    | 3.96    |
| 100              |                                          | 7.85                                               | 6.64    | 5.15    | 4.73    | 4.10    |
| 110              |                                          | 8.32                                               | 6.90    | 5.47    | 4.91    | 4.33    |
| 120              |                                          | 8.60                                               | 7.04    | 5.62    | 5.21    | 4.52    |
| 130              |                                          | 8.79                                               | 7.20    | 5.79    | 5.44    | 4.74    |
| 140              |                                          | 8.90                                               | 7.34    | 5.98    | 5.55    | 4.98    |
| 150              |                                          | 8.97                                               | 7.42    | 5.90    | 5.62    | 5.31    |
| 40               |                                          | Ag@TiO <sub>2</sub> /Pani<br>( <i>p</i> TSA doped) | 14.80   | 12.17   | 9.98    | 9.04    |
| 50               | 15.70                                    |                                                    | 12.86   | 10.61   | 9.62    | 8.73    |
| 60               | 16.46                                    |                                                    | 13.60   | 11.21   | 10.29   | 9.30    |
| 70               | 17.38                                    |                                                    | 14.34   | 11.89   | 10.85   | 9.86    |
| 80               | 18.12                                    |                                                    | 14.92   | 12.56   | 11.44   | 10.40   |
| 90               | 19.05                                    |                                                    | 15.60   | 13.20   | 12.09   | 10.99   |
| 100              | 20.00                                    |                                                    | 16.32   | 13.83   | 12.66   | 11.57   |
| 110              | 21.12                                    |                                                    | 17.07   | 14.54   | 13.23   | 12.15   |
| 120              | 22.12                                    |                                                    | 17.50   | 15.06   | 13.68   | 12.69   |
| 130              | 22.45                                    |                                                    | 18.02   | 15.56   | 14.24   | 13.21   |
| 140              | 21.49                                    |                                                    | 18.16   | 16.00   | 14.73   | 13.81   |
| 150              | 18.54                                    |                                                    | 17.57   | 16.11   | 15.10   | 14.16   |

**Photodegradation of (a) MB, and (b) BB by Pani and Ag@TiO<sub>2</sub>/Pani nanocomposite under UV light irradiation**

The Ag@TiO<sub>2</sub>/Pani nanocomposite was also tested for the photocatalytic degradation of MB and BB under UV light irradiation (specification: Philips lamp, 16 W).

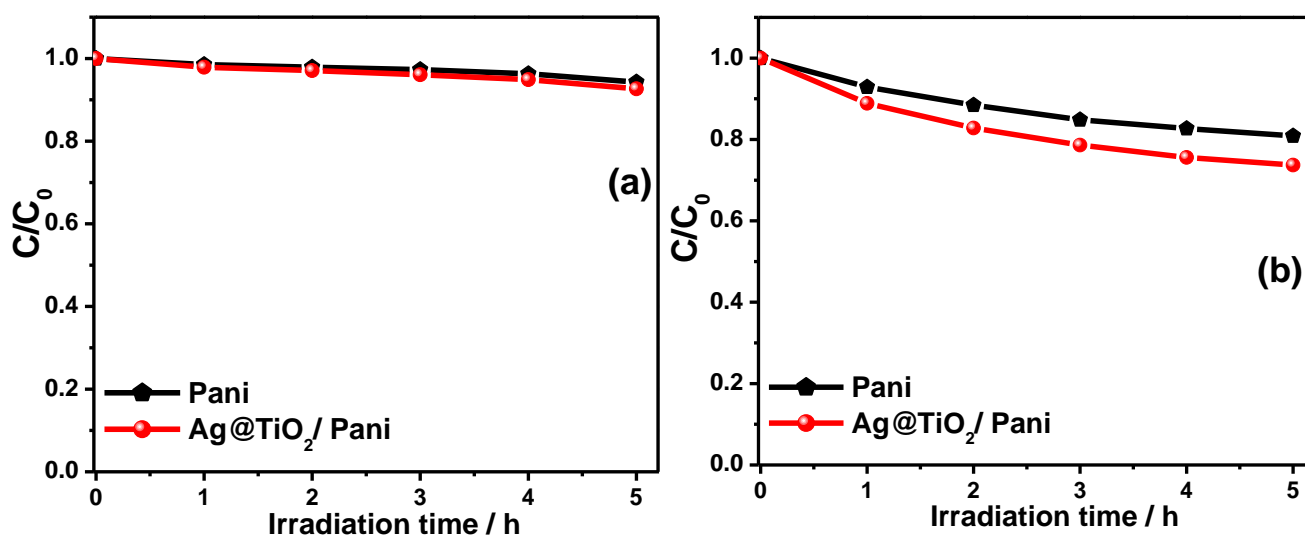

**Fig. S6.** Plot of  $C/C_0$  vs the irradiation time (h) for the photodegradation of (a) MB, and (b) BB by Pani and Ag@TiO<sub>2</sub>/Pani nanocomposite under UV light irradiation.
